# Supplementary material for: Insight into the origin of carbon corrosion in positive electrodes of supercapacitors
Source: Royal Society of Chemistry journal article supplement (doi:10.1039/c8ta11005k), 2019-01-01
Supplement: c8ta11005k1.pdf [file c8ta11005k1.pdf]

## Supplementary Information

### **Insight into the origin of carbon corrosion in positive electrodes of supercapacitors**

Rui Tang, Kaishi Taguchi, Hiroto Nishihara\*, Takafumi Ishii, Emilia Morallón, Diego Cazorla-Amorós, Toshihiro Asada, Naoya Kobayashi, Yasuji Muramatsu and Takashi Kyotani

## **1. Fabrication of anthracite-derived activated carbon (AAC)**

Spanish anthracite was ground and sieved to a particle size of 600 to 1000  $\mu\text{m}$ . The resulting powder (2 g) was mixed with 10 ml of KOH aqueous solution (the ratio is KOH:anthracite = 4:1) and the mixture was stirred at 60  $^{\circ}\text{C}$  for 2 h. The slurry thus obtained was dried in an oven at 110  $^{\circ}\text{C}$  overnight. Then, the sample was heat treated in a horizontal furnace at 700  $^{\circ}\text{C}$  for 1 h (heating rate is 5  $^{\circ}\text{C min}^{-1}$ ).

## 2. Nanoporosity

**Table S1.** Textural properties of carbon samples.

| Sample | $S_{\text{BET}}$<br>( $\text{m}^2 \text{ g}^{-1}$ ) | $V_{50\text{nm}}^a$<br>( $\text{cm}^3 \text{ g}^{-1}$ ) | $V_{\text{t}}^b$<br>( $\text{cm}^3 \text{ g}^{-1}$ ) | $V_{\text{micro}}^c$<br>( $\text{cm}^3 \text{ g}^{-1}$ ) | $V_{\text{meso}}^d$<br>( $\text{cm}^3 \text{ g}^{-1}$ ) | $V_{\text{macro}}^e$<br>( $\text{cm}^3 \text{ g}^{-1}$ ) |
|--------|-----------------------------------------------------|---------------------------------------------------------|------------------------------------------------------|----------------------------------------------------------|---------------------------------------------------------|----------------------------------------------------------|
| rGO    | 369                                                 | 0.47                                                    | 0.48                                                 | 0.13                                                     | 0.34                                                    | 0.01                                                     |
| XC72   | 220                                                 | 0.35                                                    | 1.35                                                 | 0.09                                                     | 0.26                                                    | 1.00                                                     |
| DB     | 732                                                 | 0.90                                                    | 1.76                                                 | 0.29                                                     | 0.61                                                    | 0.86                                                     |
| KB     | 767                                                 | 0.80                                                    | 1.62                                                 | 0.27                                                     | 0.53                                                    | 0.82                                                     |
| BP     | 1341                                                | 1.44                                                    | 3.10                                                 | 0.54                                                     | 0.90                                                    | 1.66                                                     |
| YP50F  | 1708                                                | 0.79                                                    | 0.82                                                 | 0.73                                                     | 0.06                                                    | 0.03                                                     |
| AAC    | 3650                                                | 2.15                                                    | 2.18                                                 | 1.34                                                     | 0.81                                                    | 0.03                                                     |
| AACH2  | 3318                                                | 2.01                                                    | 2.04                                                 | 1.24                                                     | 0.77                                                    | 0.03                                                     |
| ZTC    | 3598                                                | 1.67                                                    | 1.91                                                 | 1.52                                                     | 0.15                                                    | 0.24                                                     |

<sup>a</sup> Pore volume for pores less than 50 nm, which is calculated from the N<sub>2</sub> adsorption amount at  $P/P_0 = 0.96$ .

<sup>b</sup> Total pore volume calculated from the N<sub>2</sub> adsorption amount at  $P/P_0 = 0.99$ .

<sup>c</sup> Micropore volume calculated by the Dubinin-Radushkevitch method.

<sup>d</sup> Mesopore volume calculated by  $V_{\text{meso}} = V_{50\text{nm}} - V_{\text{micro}}$ .

<sup>e</sup> Macropore volume calculated by  $V_{\text{macro}} = V_{\text{t}} - V_{50\text{nm}}$ . Note that  $V_{\text{macro}}$  covers only a part of macropore volume which can be detected by N<sub>2</sub> adsorption at  $-196^\circ \text{C}$ .

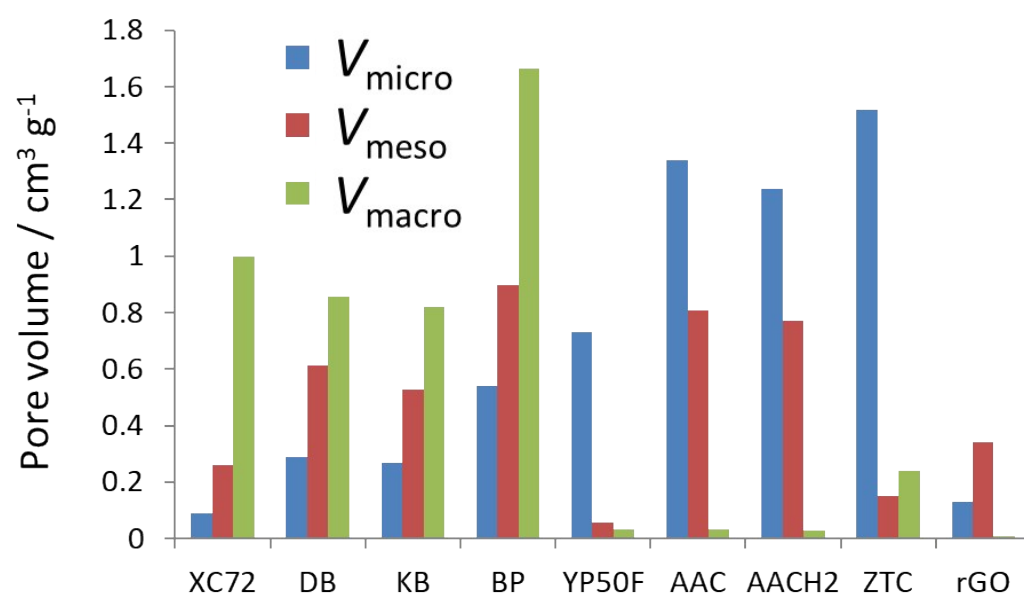

**Fig. S1** Compositions of micro/meso/macropore volumes of carbon samples.

### 3. Crystallinity

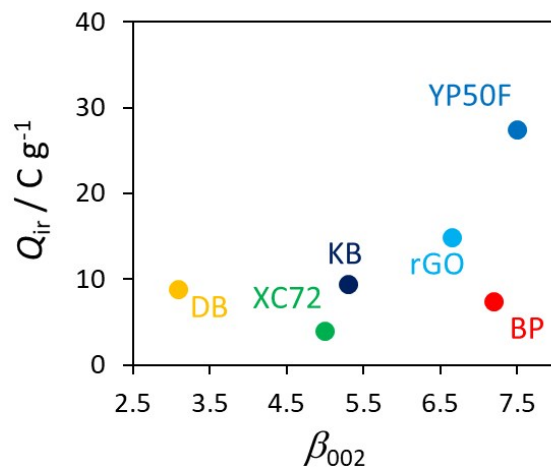

**Fig. S2** The plot of  $Q_{ir}$  against the FWHM of the carbon 002 peak. AAC, AACH2, and ZTC are not plotted because they show no 002 peak.

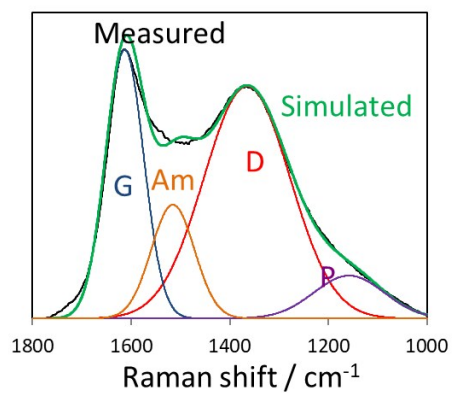

**Fig. S3** Curve-fitting result of AAC Raman spectra.

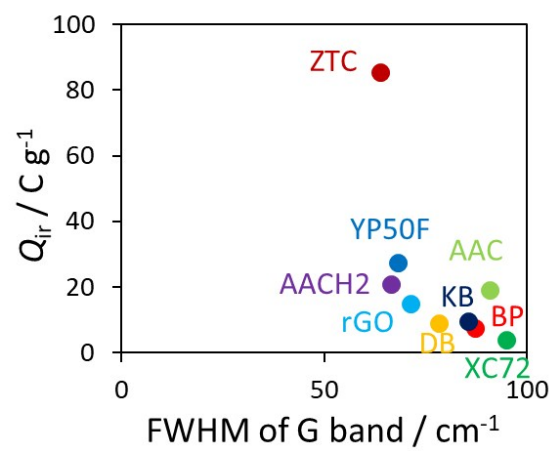

**Fig. S4** The plot of  $Q_{ir}$  against the FWHM of the carbon G-band.

#### 4. Spin/H-terminated edge sites ratio

Table S2 shows the ratios of spin density to the number of H-terminated edge sites for all samples. The spin density is measured by magnetic susceptibility measurement with the assumption that  $S = 1/2$ . The amount of H-terminated edge sites were calculated by using the data of desorbed  $H_2$  during TPD measurements. Here we assume that 1 mole of desorbed  $H_2$  originates from 2 moles of H-terminated edge sites.

**Table S2.** The ratios of spin to H-terminated edge sites (calculated by using the amount of desorbed  $H_2$  gas during TPD measurement).

| Sample | Spin density ( $\times 10^{20}$ spin $g^{-1}$ ) | Number of H-terminated edge sites ( $\times 10^{20}$ $g^{-1}$ ) | Ratio of spin to H-terminated edge sites |
|--------|-------------------------------------------------|-----------------------------------------------------------------|------------------------------------------|
| YP50F  | 0.71                                            | 25.5                                                            | 2.8%                                     |
| ZTC    | 0.98                                            | 73.3                                                            | 1.3%                                     |
| AAC    | 1.5                                             | 8.62                                                            | 17.4%                                    |
| AACH2  | 1.2                                             | 17.9                                                            | 6.7%                                     |
| DB     | 0.15                                            | 5.37                                                            | 2.8%                                     |
| KB     | 0.15                                            | 11.8                                                            | 1.3%                                     |
| XC72   | 0.091                                           | 4.92                                                            | 1.8%                                     |
| BP     | 0.15                                            | 7.71                                                            | 2.1%                                     |

### 5. Coefficient of determination ( $R^2$ ).

In Fig. 7, a coefficient of determination ( $R^2$ ) is calculated by the following equation:

$$R^2 = 1 - \frac{\sum_i (y_i - f_i)^2}{\sum_i (y_i - \bar{y})^2} \quad (1)$$

where  $y_i$  is the data set,  $\bar{y}$  is the mean of the observed data,  $f_i$  is a predicted value associated with each  $y_i$ . For an ideal linear correlation, the value of  $R^2$  becomes 1.
